# Supplementary material
Source: PubMed Central journal article supplement (PMC9428147)
Supplement: 41416_2022_1852_MOESM1_ESM.pdf [file 41416_2022_1852_MOESM1_ESM.pdf]

## Supplementary figure and table legends

**Supplementary Figure 1:** Consort diagram of BRAF-BeCool population.

**Supplementary Figure 2:** Kaplan-Meier curves of progression-free survival (panel A) and overall survival (panel B) according to sidedness in BRAF-BeCool population.

**Supplementary Figure 3:** Kaplan-Meier curves of progression-free survival and overall survival according to sidedness and treatment in the MSS/pMMR subgroup of BRAF-BeCool population.

**Supplementary Figure 4:** Kaplan-Meier curves of progression-free survival (panel A) and overall survival (panel B) according to ECOG-PS in BRAF-BeCool population.

**Supplementary Figure 5:** Expression of TOP2A, ERCC1 and ERCC2 genes based on sidedness in both MSS/pMMR and MSI-H/dMMR cohorts of CGP population.

**Supplementary Figure 6:** Distribution of immune/stromal cells of tumour microenvironment based on sidedness in both MSS/pMMR (panel A) and MSI-H/dMMR (panel B) cohorts of CGP population.

**Supplementary Figure 7:** BM1/BM2 classification of CGP tumour samples according to the simplified Barras classifier (panel A). Distribution of BM subtypes based on sidedness in both MSS/pMMR and MSI-H/dMMR cohorts of CGP population (panel B).

**Supplementary Figure 8:** Distribution and mutual exclusivity/co-occurrence of WNT pathway alterations in both MSS/pMMR (panel A) and MSI-H/dMMR (panel B) cohorts of CGP population.

**Supplementary Figure 9:** Frequency of most common mutations (panel A), amplifications (panel B) and fusions (panel C) in MSI-H/dMMR cohort of the CGP population.

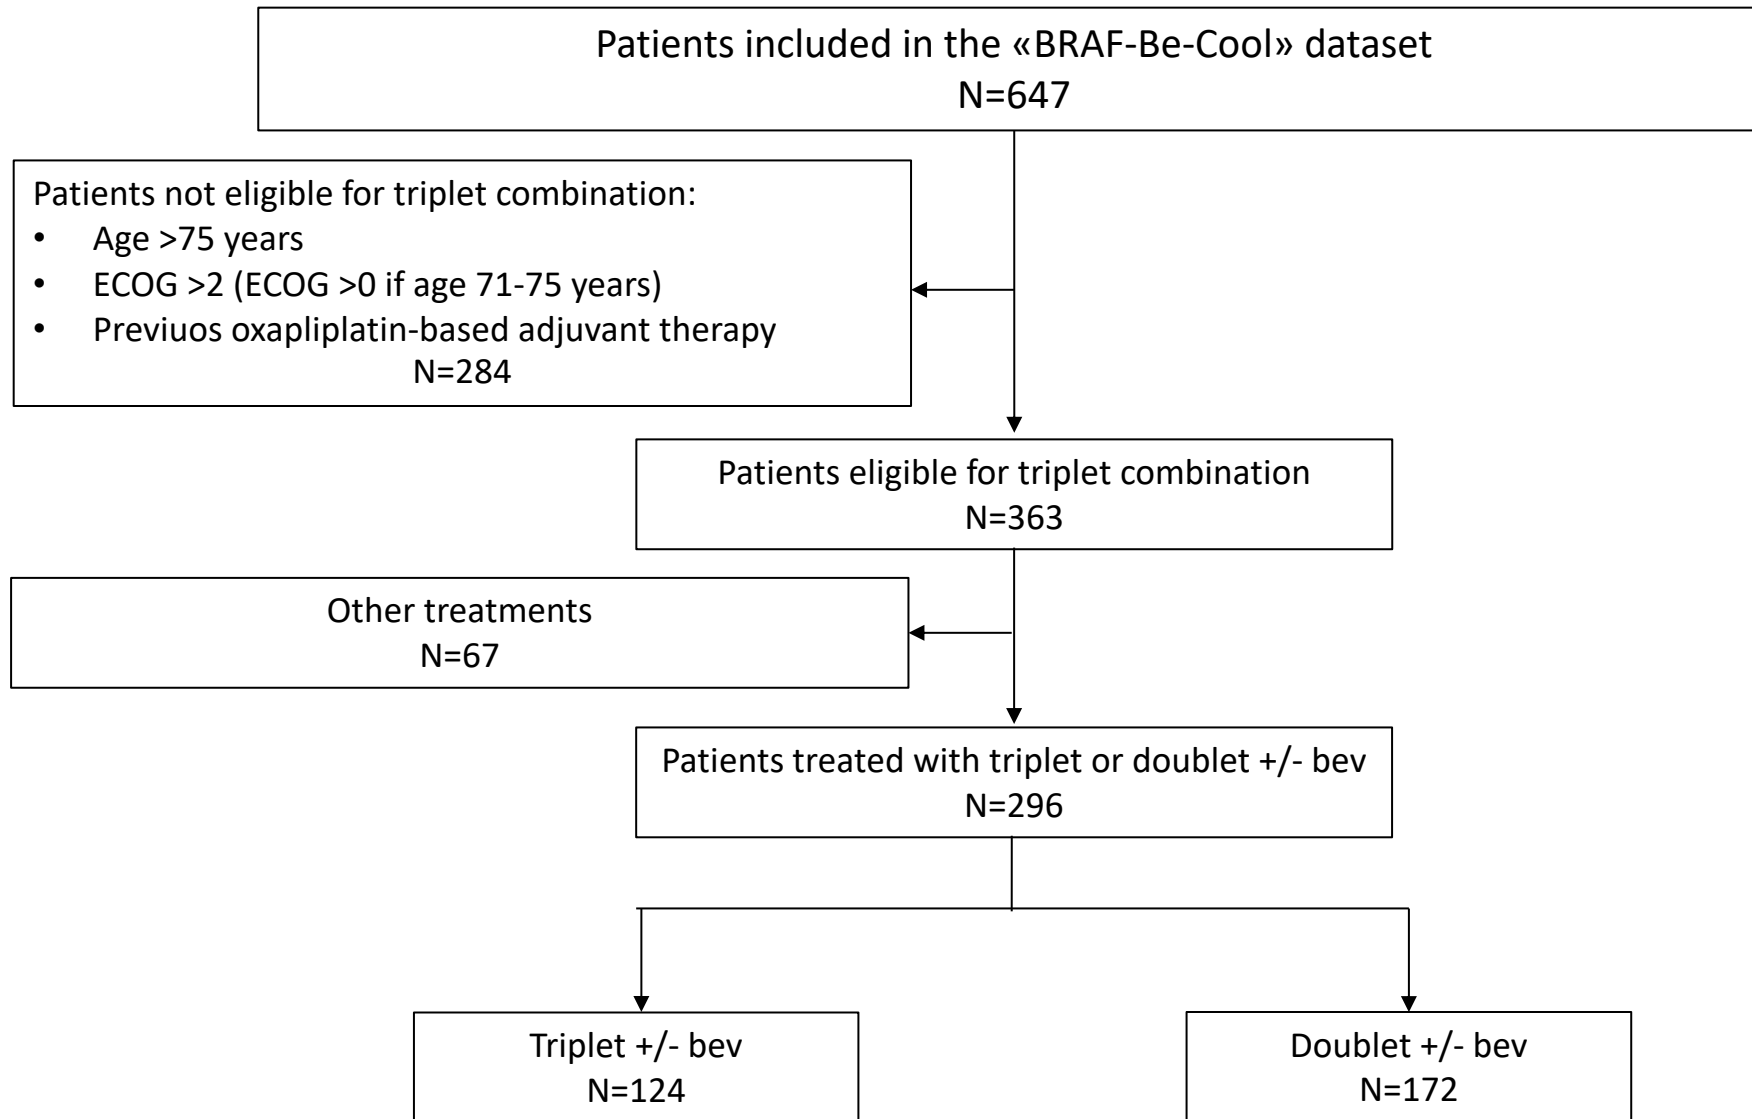

Supplementary Figure 1

**Panel A**

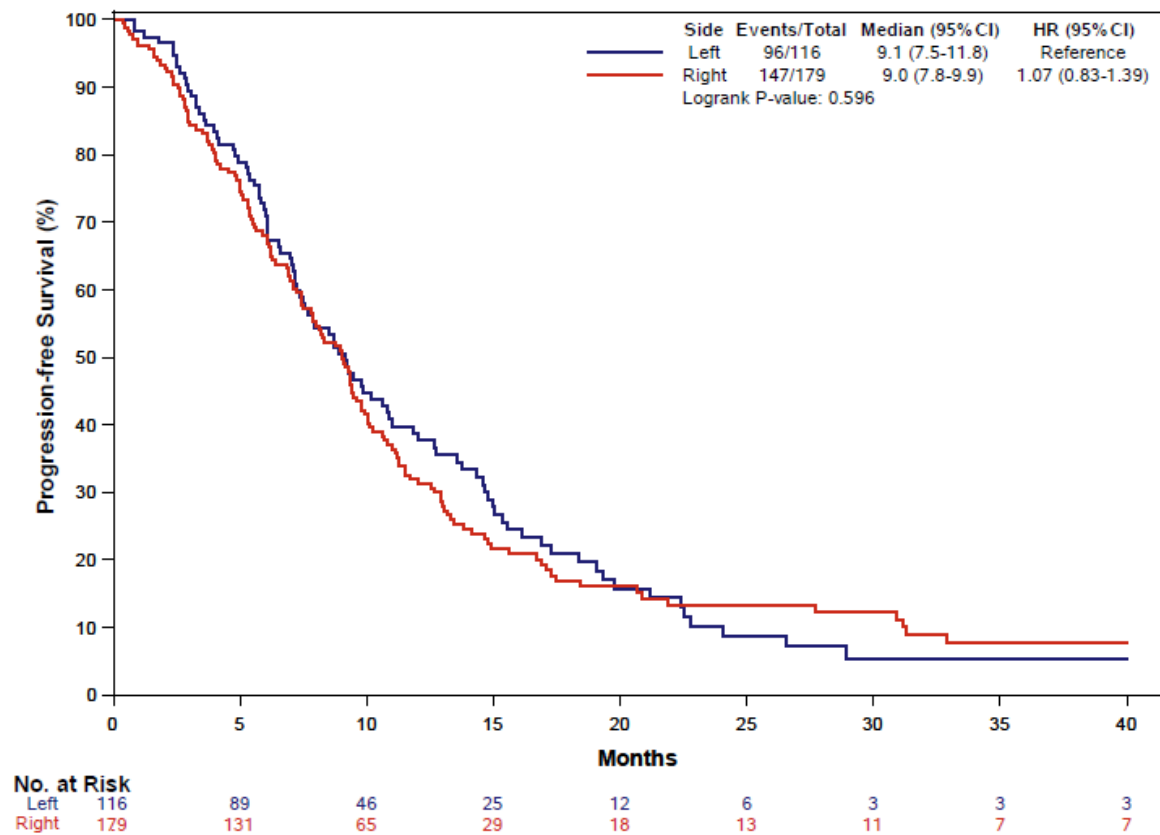

**Panel B**

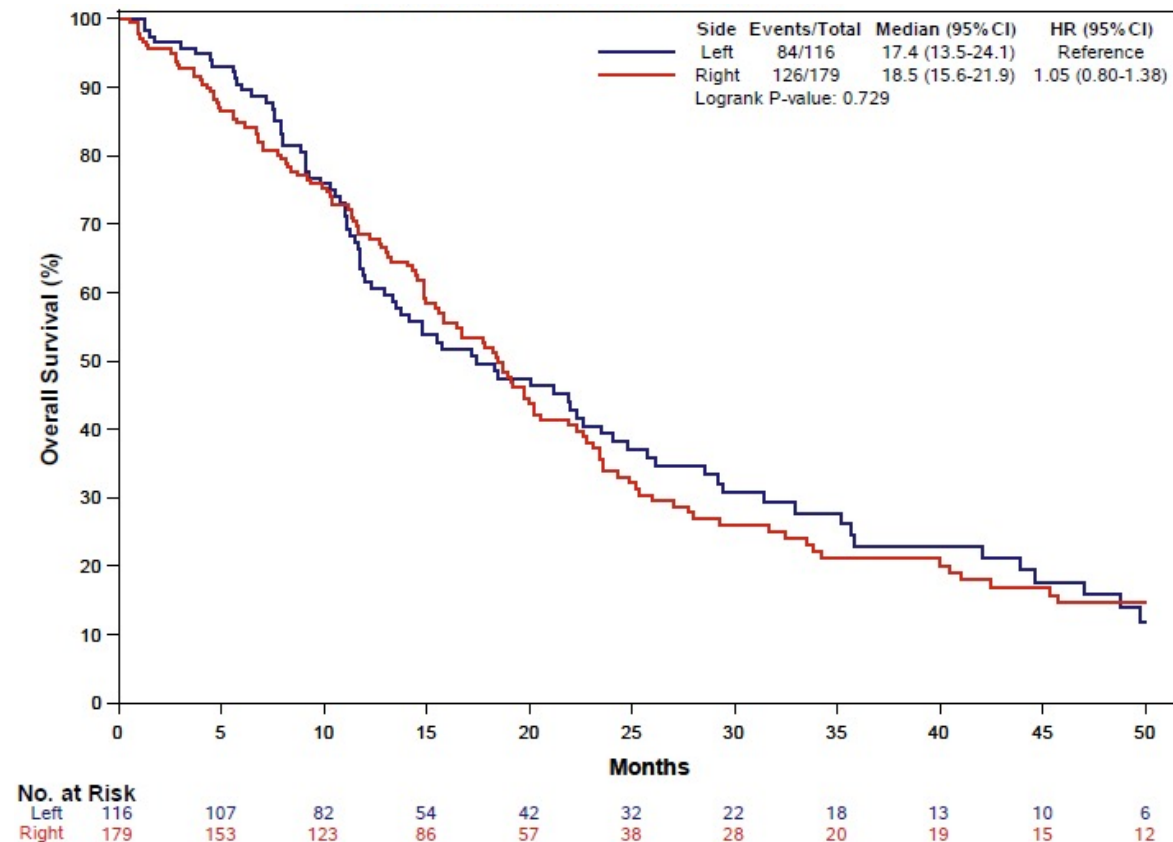

**Supplementary Figure 2**

**Panel A**

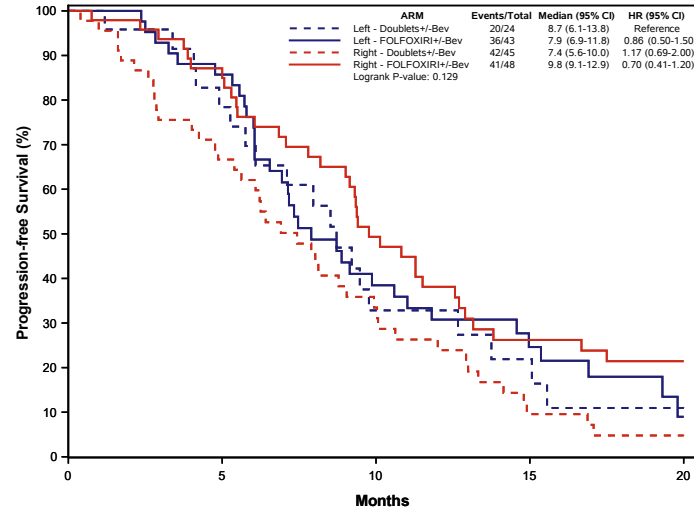

**No. at Risk**

|                         |    |    |    |    |   |
|-------------------------|----|----|----|----|---|
| Left - Doublets+/-Bev   | 24 | 18 | 7  | 4  | 1 |
| Left - FOLFOXIRI+/-Bev  | 43 | 36 | 15 | 8  | 2 |
| Right - Doublets+/-Bev  | 45 | 30 | 14 | 4  | 2 |
| Right - FOLFOXIRI+/-Bev | 48 | 40 | 22 | 11 | 8 |

**Panel B**

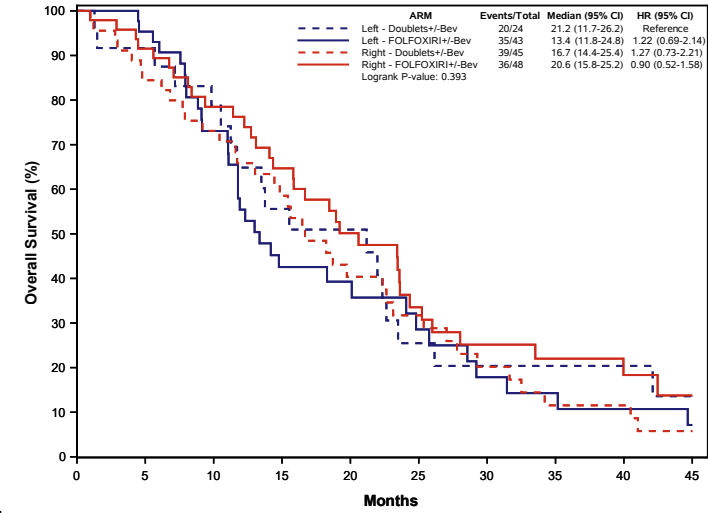

**No. at Risk**

|                         |    |    |    |    |    |    |   |   |   |   |
|-------------------------|----|----|----|----|----|----|---|---|---|---|
| Left - Doublets+/-Bev   | 24 | 22 | 18 | 12 | 10 | 5  | 4 | 3 | 3 | 2 |
| Left - FOLFOXIRI+/-Bev  | 43 | 41 | 29 | 16 | 11 | 8  | 5 | 4 | 3 | 2 |
| Right - Doublets+/-Bev  | 45 | 38 | 32 | 24 | 15 | 11 | 7 | 4 | 4 | 2 |
| Right - FOLFOXIRI+/-Bev | 48 | 43 | 35 | 28 | 19 | 12 | 8 | 6 | 5 | 3 |

**Panel C**

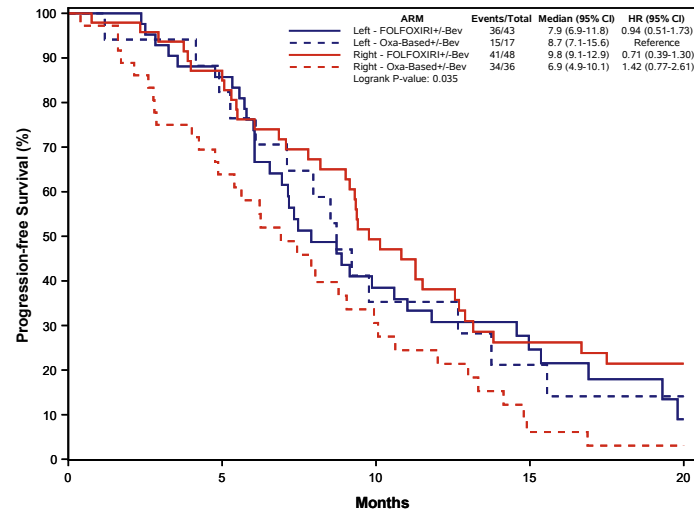

**No. at Risk**

|                         |    |    |    |    |   |
|-------------------------|----|----|----|----|---|
| Left - FOLFOXIRI+/-Bev  | 43 | 36 | 15 | 8  | 2 |
| Left - Oxa-Based+/-Bev  | 17 | 14 | 6  | 3  | 1 |
| Right - FOLFOXIRI+/-Bev | 48 | 40 | 22 | 11 | 8 |
| Right - Oxa-Based+/-Bev | 36 | 23 | 10 | 2  | 1 |

**Panel D**

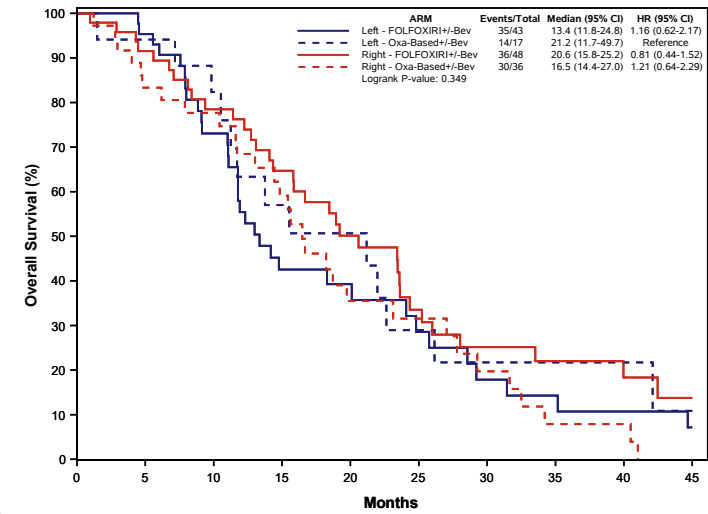

**No. at Risk**

|                         |    |    |    |    |    |    |   |   |   |   |
|-------------------------|----|----|----|----|----|----|---|---|---|---|
| Left - FOLFOXIRI+/-Bev  | 43 | 41 | 29 | 16 | 11 | 8  | 5 | 4 | 3 | 2 |
| Left - Oxa-Based+/-Bev  | 17 | 16 | 14 | 9  | 7  | 4  | 3 | 2 | 2 | 1 |
| Right - FOLFOXIRI+/-Bev | 48 | 43 | 35 | 28 | 19 | 12 | 8 | 6 | 5 | 3 |
| Right - Oxa-Based+/-Bev | 36 | 30 | 27 | 19 | 10 | 8  | 5 | 2 | 2 | 0 |

Panel A

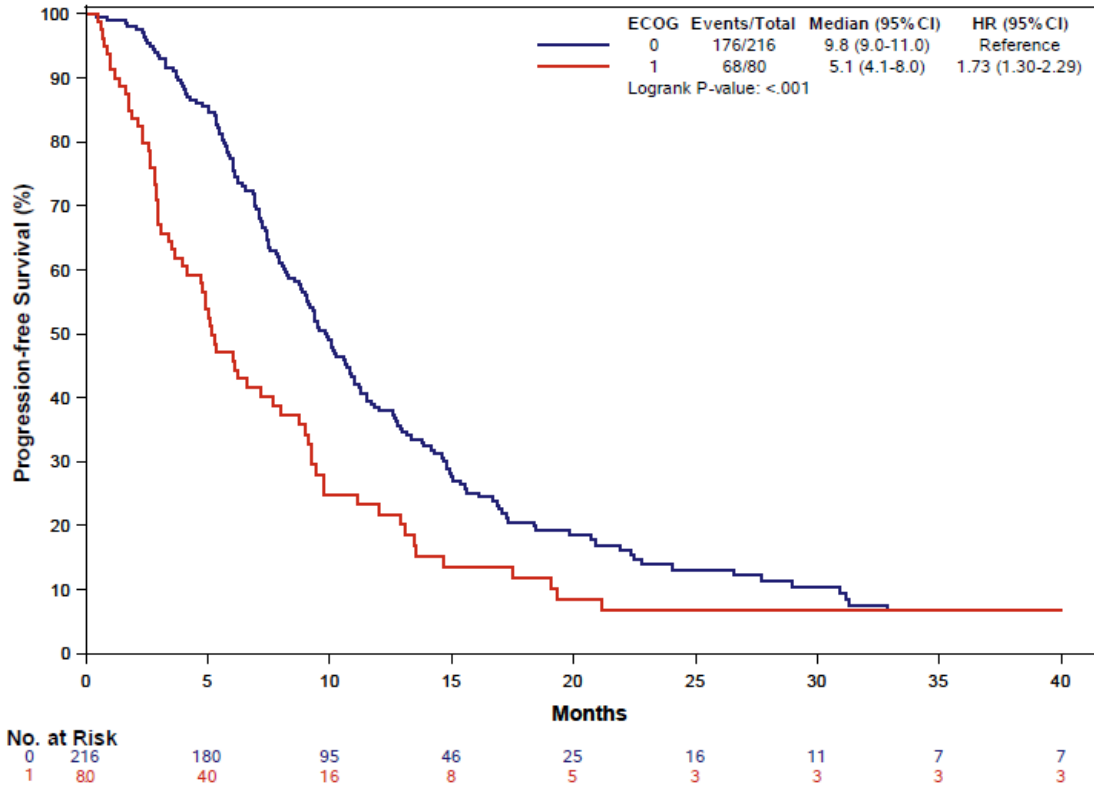

Panel B

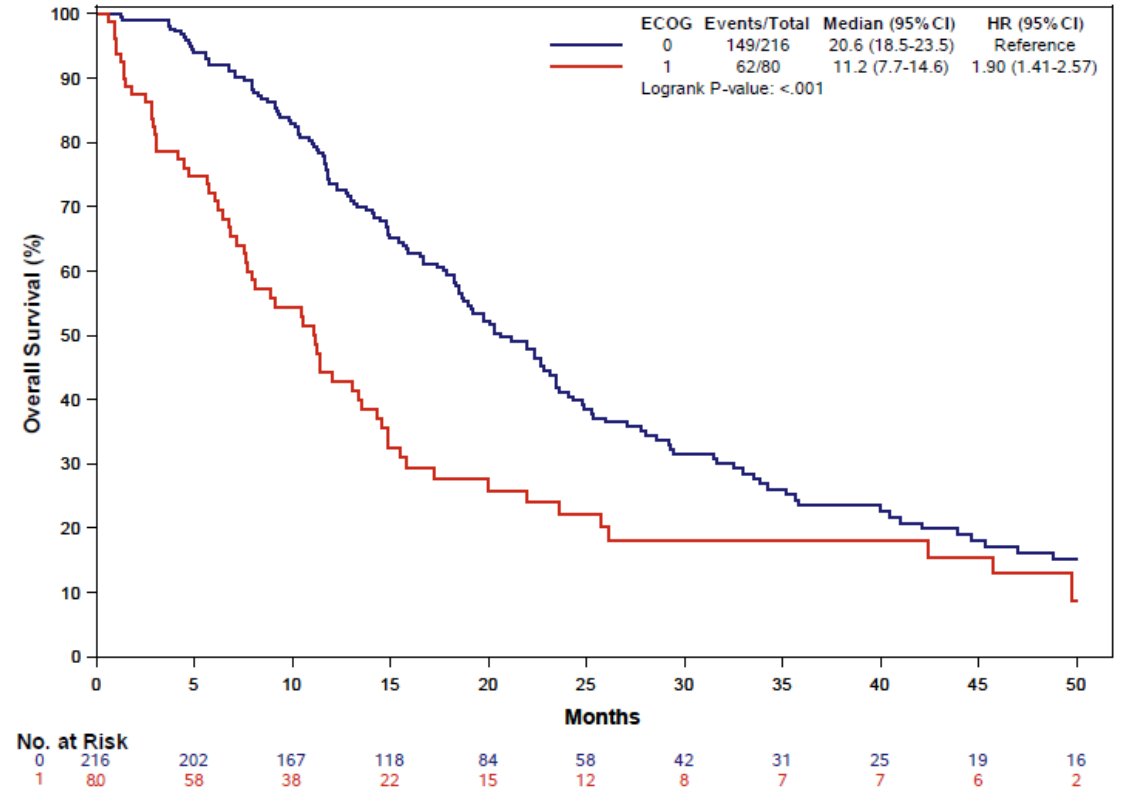

Supplementary Figure 4

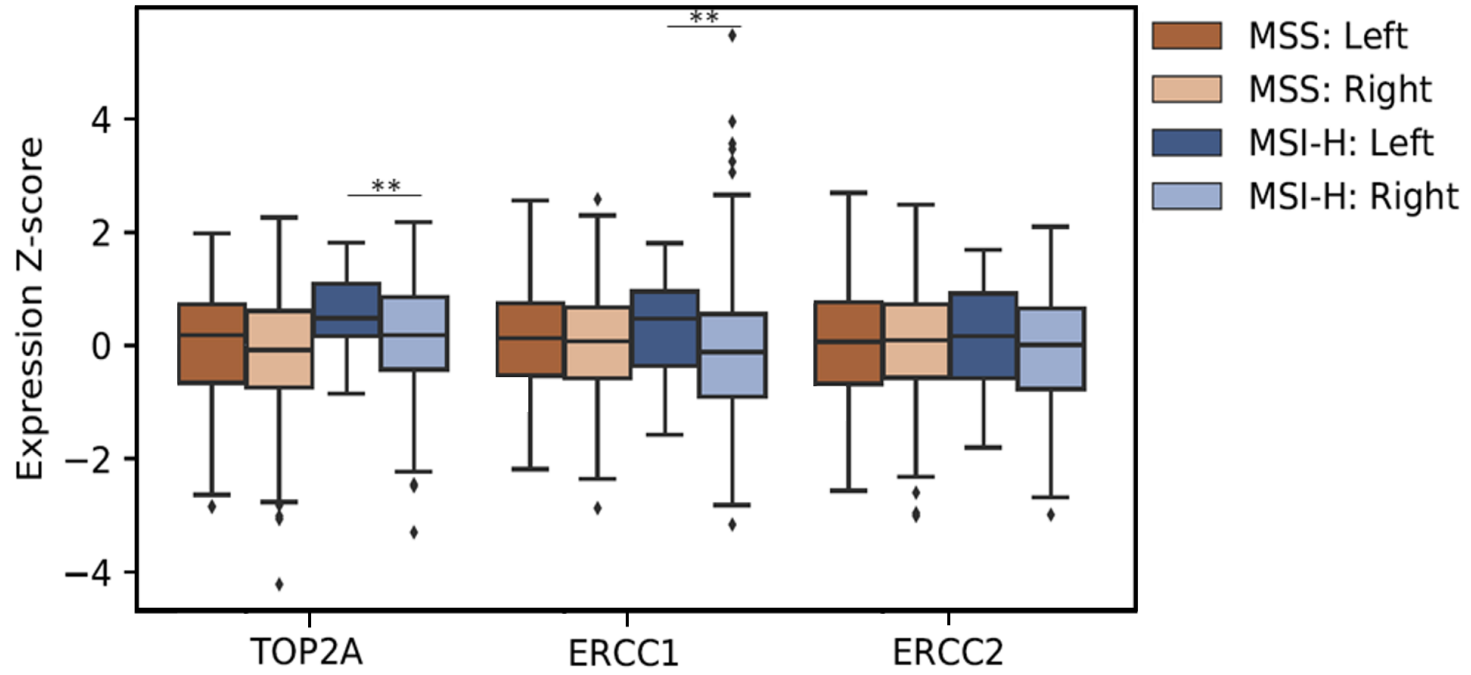

| Gene  | Subgroup | Median expression (TPM) |       | Fold change (Left/Right) | p-value       | q-value      |
|-------|----------|-------------------------|-------|--------------------------|---------------|--------------|
|       |          | Left                    | Right |                          |               |              |
| TOP2A | MSS      | 35.2                    | 28.7  | 1.2                      | 0.067         | 0.15         |
|       | MSI-H    | 44.8                    | 35.3  | 1.3                      | <b>0.0066</b> | <b>0.030</b> |
| ERCC1 | MSS      | 9.2                     | 8.9   | 1.0                      | 0.27          | 0.31         |
|       | MSI-H    | 11.2                    | 8.0   | 1.4                      | <b>0.0049</b> | <b>0.030</b> |
| ERCC2 | MSS      | 5.7                     | 5.8   | 1.0                      | 0.42          | 0.42         |
|       | MSI-H    | 6.0                     | 5.5   | 1.1                      | 0.087         | 0.16         |

Supplementary Figure 5

## Panel A

### MSS/pMMR

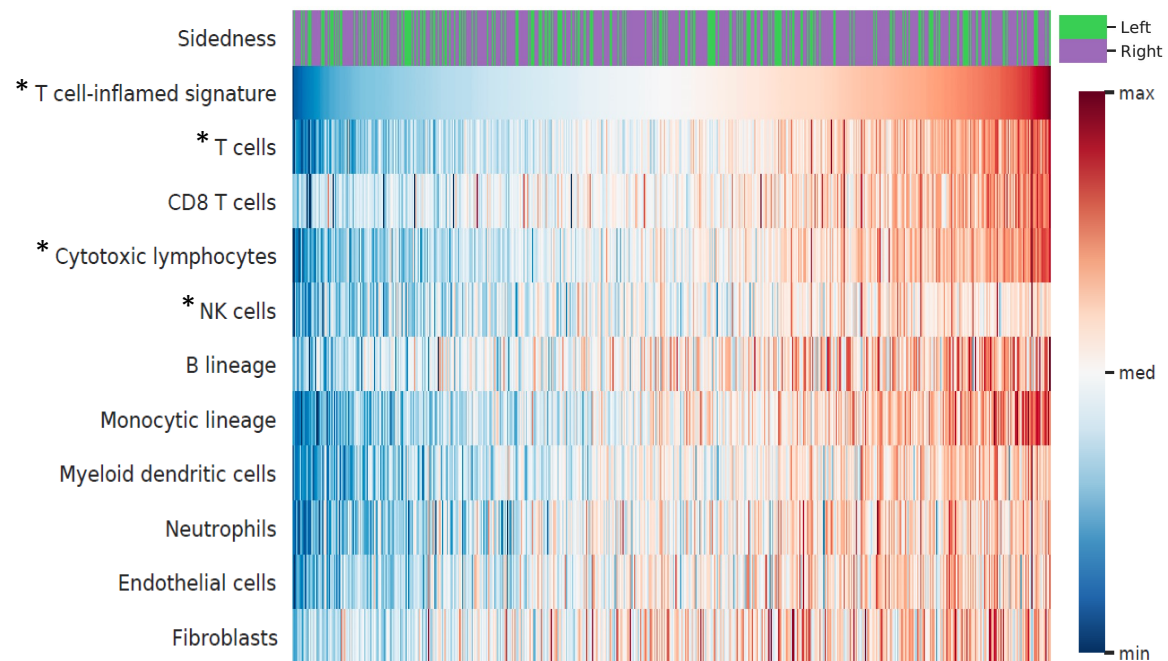

\*p<0.05 (raw p-value)

## Panel B

### MSI-H/dMMR

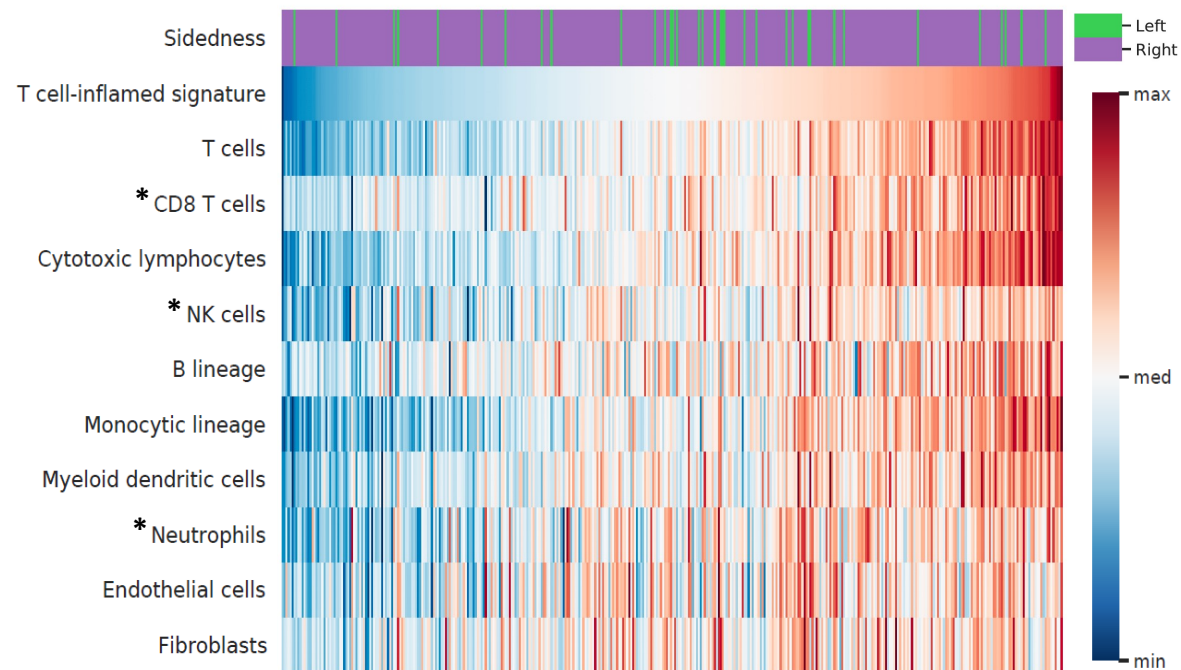

Panel A

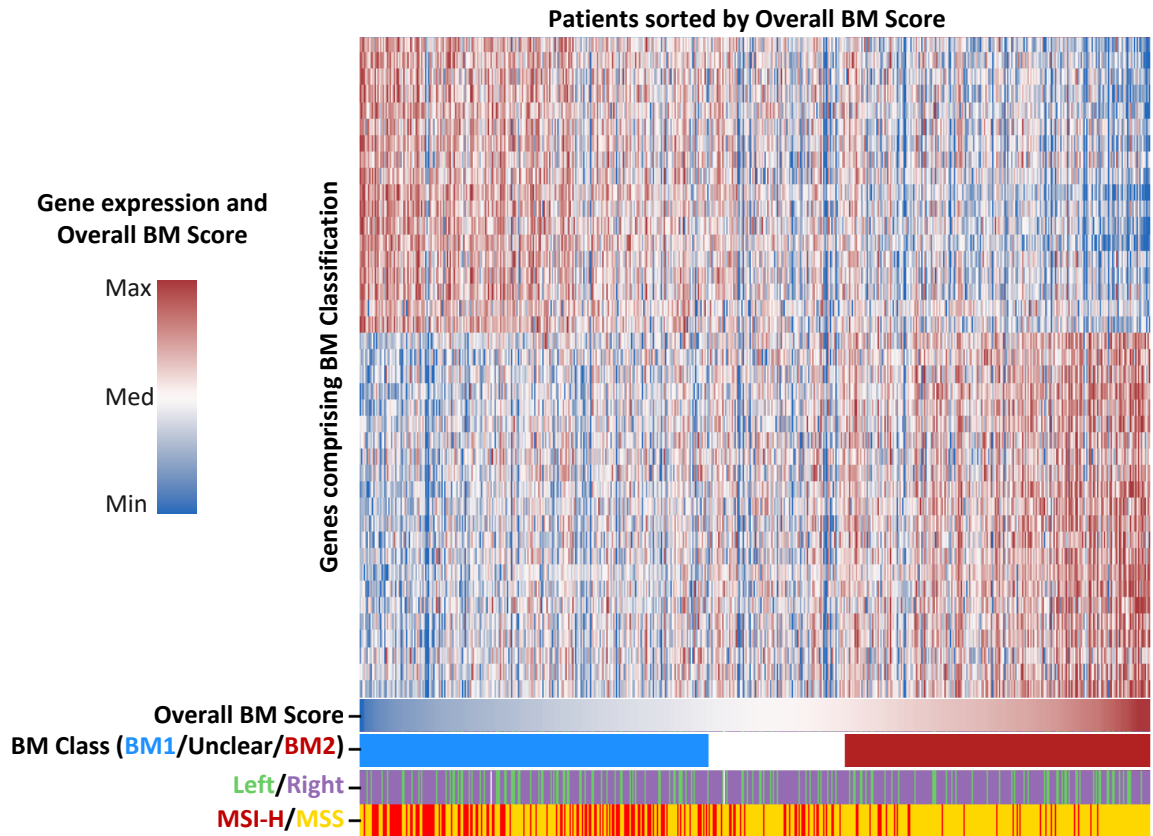

Panel B

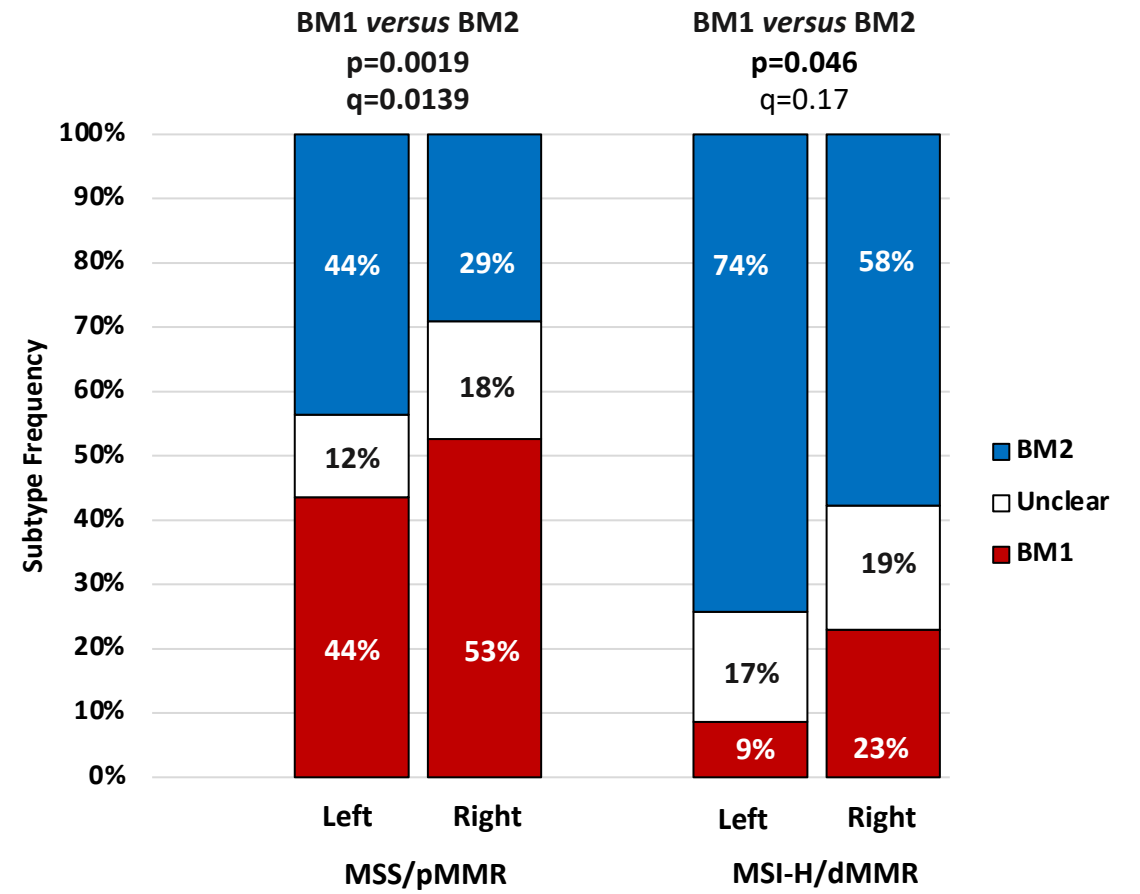



# Panel A

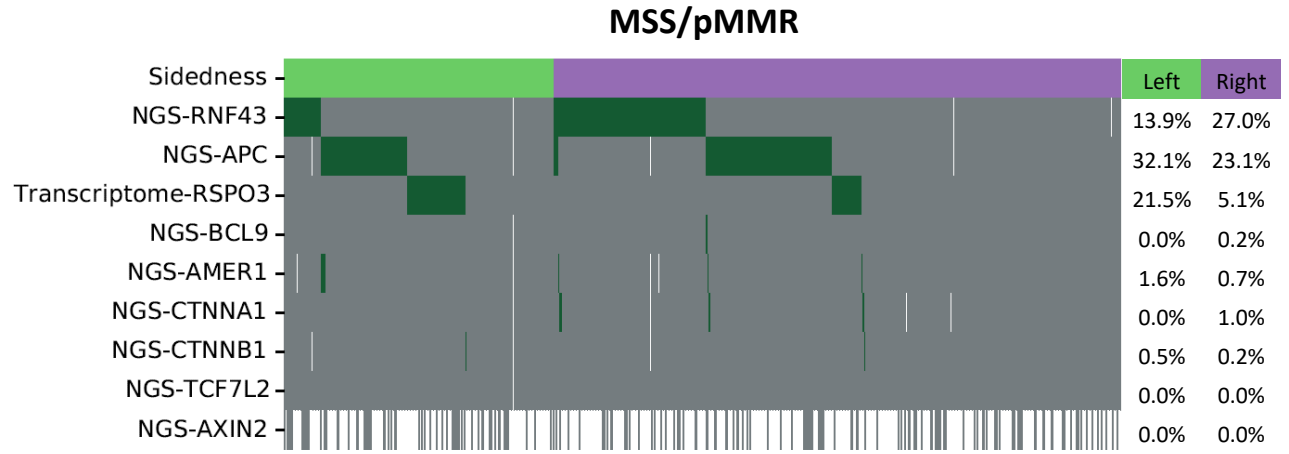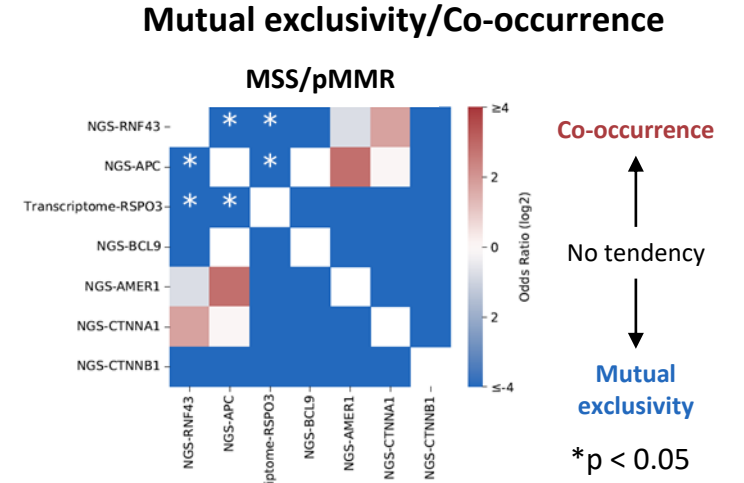

# Panel B

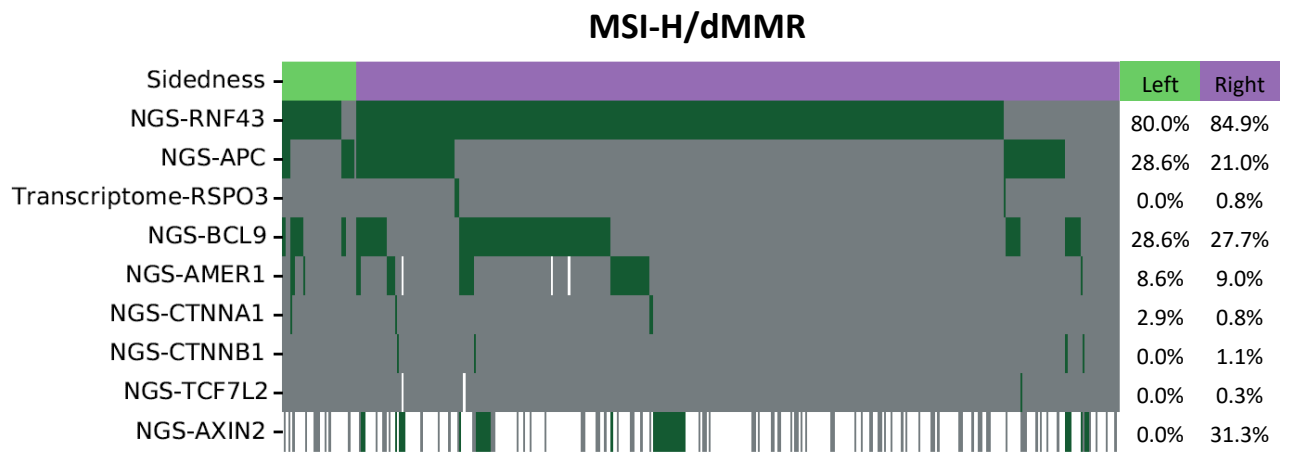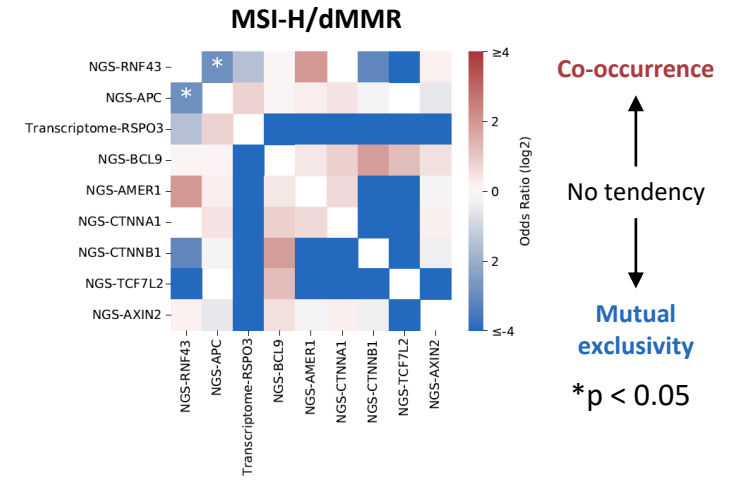

Mutation/Fusion ■ Positive ■ Negative □ Indeterminate Note: AXIN2 only available on WES panel

Panel A

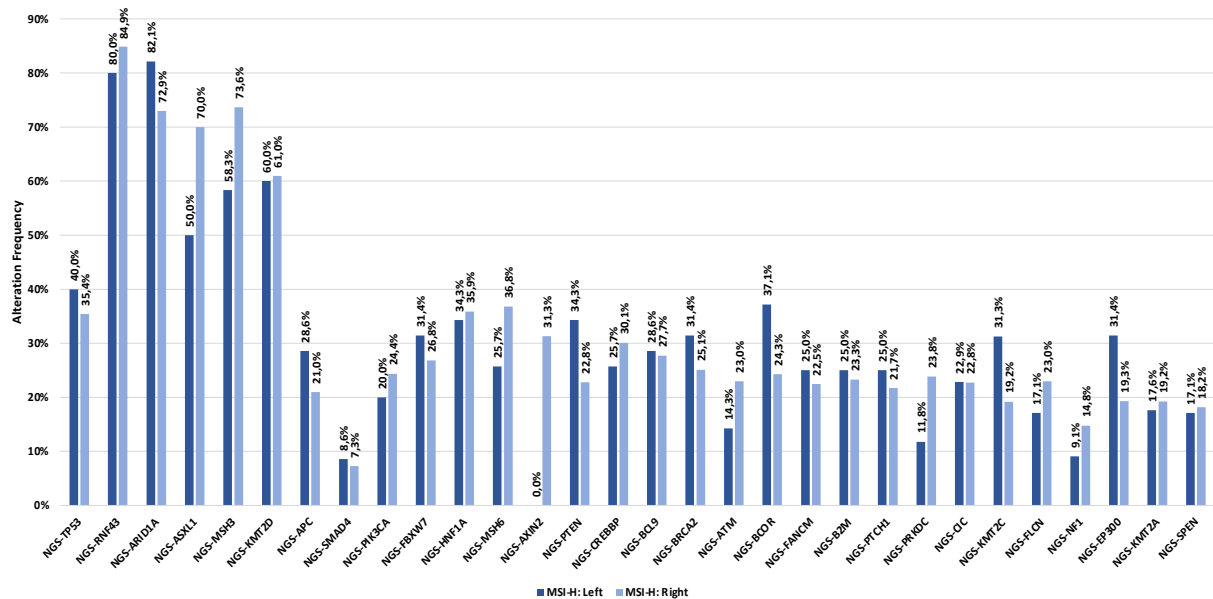

Panel B

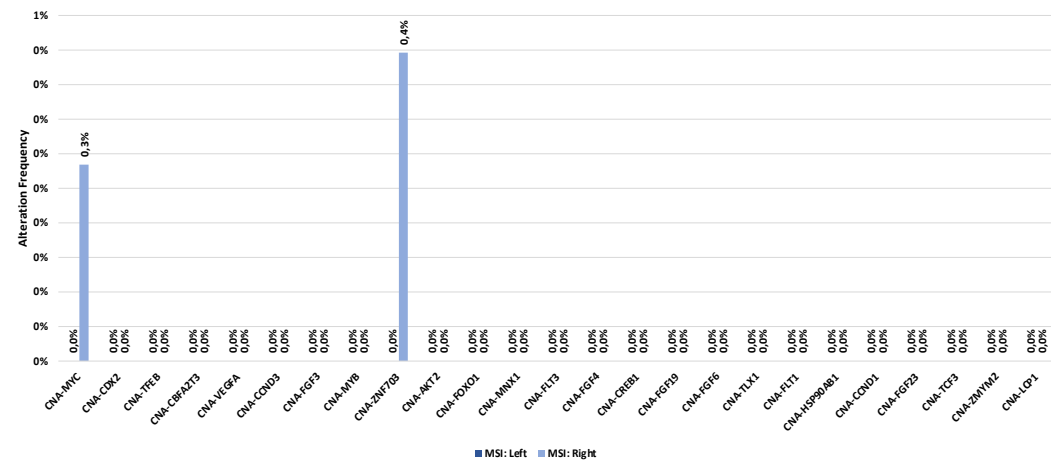

Panel C

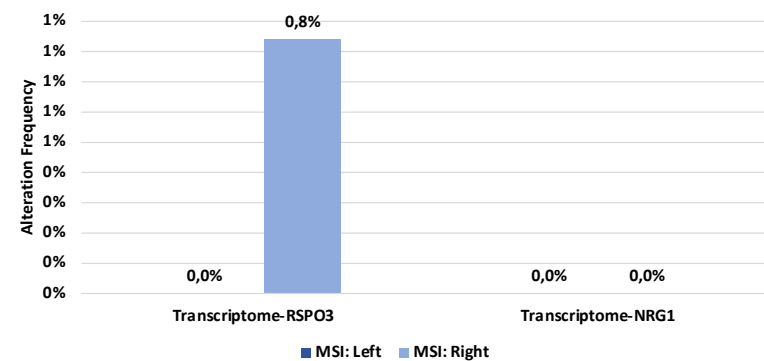

**Supplementary Table 1. Patients' characteristics of BRAF-BeCool population**

|                                      | Overall population<br>N=296<br>n (%) |
|--------------------------------------|--------------------------------------|
| <b>Age (years)</b>                   |                                      |
| <b>Median</b>                        | 61                                   |
| <b>Range (min – max)</b>             | 24 - 75                              |
| <b>Sex</b>                           |                                      |
| <b>Male</b>                          | 138 (47%)                            |
| <b>Female</b>                        | 158 (53%)                            |
| <b>ECOG-PS</b>                       |                                      |
| <b>0</b>                             | 216 (73%)                            |
| <b>1-2</b>                           | 80 (27%)                             |
| <b>Site of Primary Tumor</b>         |                                      |
| <b>Right</b>                         | 179 (61%)                            |
| <b>Left and rectum</b>               | 116 (39%)                            |
| <b>NA</b>                            | 1                                    |
| <b>Microsatellite status</b>         |                                      |
| <b>pMMR/MSS</b>                      | 160 (83%)                            |
| <b>dMMR/MSI-H</b>                    | 32 (17%)                             |
| <b>NA</b>                            | 104                                  |
| <b>Resected Primary Tumor</b>        |                                      |
| <b>Yes</b>                           | 215 (73%)                            |
| <b>No</b>                            | 81 (27%)                             |
| <b>Liver Only Disease</b>            |                                      |
| <b>Yes</b>                           | 75 (25%)                             |
| <b>No</b>                            | 221 (75%)                            |
| <b>Number of metastatic sites</b>    |                                      |
| <b>1</b>                             | 144 (49%)                            |
| <b>&gt;1</b>                         | 152 (51%)                            |
| <b>R0/R1 Resection of metastases</b> |                                      |
| <b>Yes</b>                           | 54 (18%)                             |
| <b>No</b>                            | 242 (82%)                            |

|                                     |                                         |           |
|-------------------------------------|-----------------------------------------|-----------|
| <b>Time to Metastases</b>           |                                         |           |
|                                     | <b>Synchronous</b>                      | 264 (89%) |
|                                     | <b>Metachronous</b>                     | 32 (11%)  |
| <b>Simplified risk score</b>        |                                         |           |
|                                     | <b>High</b>                             | 61 (21%)  |
|                                     | <b>Intermediate</b>                     | 100 (34%) |
|                                     | <b>Low</b>                              | 132 (45%) |
|                                     | <b>NA</b>                               | 3         |
| <b>Treatment arm</b>                |                                         |           |
|                                     | <b>Doublet +/- bev</b>                  | 172 (58%) |
|                                     | <b>Triplet +/- bev</b>                  | 124 (42%) |
| <b>Bevacizumab-based treatment</b>  |                                         |           |
|                                     | <b>Yes</b>                              | 237 (80%) |
|                                     | <b>No</b>                               | 59 (20%)  |
| <b>Chemotherapy-based treatment</b> |                                         |           |
|                                     | <b>Oxaliplatin-based</b>                | 134 (45%) |
|                                     | <b>Irinotecan-based</b>                 | 38 (13%)  |
|                                     | <b>Oxaliplatin and irinotecan-based</b> | 124 (42%) |

**Legend:** N=number, ECOG-PS=Eastern Cooperative Oncology Group Performance Status, NA=not available, pMMR= proficient mismatched repair, MSS=microsatellite stable, dMMR=deficient mismatched repair, MSI-H=microsatellite instability high; Simplified score as described by Loupakis et al.<sup>12</sup>.

Supplementary Table 2. Uni- and multivariate analyses for progression-free survival and overall survival in BRAF-BeCool population

|                                      |           | Progression-free survival |                  |                       |                  | Overall survival    |                  |                       |                  |
|--------------------------------------|-----------|---------------------------|------------------|-----------------------|------------------|---------------------|------------------|-----------------------|------------------|
| Characteristics                      | N (%)     | Univariate analysis       |                  | Multivariate analysis |                  | Univariate analysis |                  | Multivariate analysis |                  |
|                                      |           | HR (95% CI)               | <i>p</i>         | HR (95% CI)           | <i>P</i>         | HR (95% CI)         | <i>p</i>         | HR (95% CI)           | <i>p</i>         |
| <b>ECOG PS</b>                       |           |                           |                  |                       |                  |                     |                  |                       |                  |
| <b>0</b>                             | 216 (73%) | 1                         | <b>&lt;0.001</b> | 1                     | 0.12             | 1                   | <b>&lt;0.001</b> | 1                     | 0.13             |
| <b>1-2</b>                           | 80 (27%)  | 1.73 (1.30-2.29)          |                  | 1.53 (0.89-2.61)      |                  | 1.91 (1.41-2.57)    |                  | 1.50 (0.89-2.51)      |                  |
| <b>Simplified risk score</b>         |           |                           |                  |                       |                  |                     |                  |                       |                  |
| <b>Low</b>                           | 132 (44%) | 1                         |                  | 1                     |                  | 1                   |                  | -                     |                  |
| <b>Intermediate</b>                  | 100 (34%) | 1.12 (0.84-1.50)          | 0.44             | 0.61 (0.40-0.94)      | <b>0.023</b>     | 1.40 (1.02-1.92)    | <b>0.036</b>     | 0.89 (0.56-1.43)      | 0.64             |
| <b>High</b>                          | 61 (21%)  | 2.29 (1.63-3.21)          | <b>&lt;0.001</b> | 1.14 (0.58-2.21)      | 0.71             | 2.75 (1.93-3.92)    | <b>&lt;0.001</b> | 1.58 (0.79-3.13)      | 0.19             |
| <b>NA</b>                            | 3         |                           |                  |                       |                  |                     |                  |                       |                  |
| <b>Time to Metastases</b>            |           |                           |                  |                       |                  |                     |                  |                       |                  |
| <b>Metachronous</b>                  | 32 (11%)  | 1                         | 0.41             | -                     | -                | 1                   | 0.15             | -                     | -                |
| <b>Synchronous</b>                   | 264 (89%) | 1.18 (0.79-1.76)          |                  | -                     |                  | 1.37 (0.88-2.13)    |                  | -                     |                  |
| <b>Resected Primary Tumour</b>       |           |                           |                  |                       |                  |                     |                  |                       |                  |
| <b>No</b>                            | 81 (27%)  | 1                         | <b>&lt;0.001</b> | 1                     | <b>0.049</b>     | 1                   | <b>&lt;0.001</b> | 1                     | <b>&lt;0.001</b> |
| <b>Yes</b>                           | 215 (73%) | 0.49 (0.37-0.66)          |                  | 0.66 (0.43-0.99)      |                  | 0.34 (0.25-0.46)    |                  | 0.47 (0.30-0.73)      |                  |
| <b>Liver Only Disease</b>            |           |                           |                  |                       |                  |                     |                  |                       |                  |
| <b>No</b>                            | 221 (75%) | 1                         | 0.80             | -                     | -                | 1                   | <b>0.09</b>      | 1                     | 0.74             |
| <b>Yes</b>                           | 75 (25%)  | 0.96 (0.73-1.28)          |                  | -                     |                  | 0.77 (0.56-1.05)    |                  | 1.09 (0.66-1.78)      |                  |
| <b>Number of metastatic sites</b>    |           |                           |                  |                       |                  |                     |                  |                       |                  |
| <b>1</b>                             | 144 (49%) | 1                         | <b>&lt;0.001</b> | 1                     | <b>0.046</b>     | 1                   | <b>&lt;0.001</b> | 1                     | 0.41             |
| <b>&gt;1</b>                         | 152 (51%) | 1.61 (1.25-2.08)          |                  | 1.50 (1.01-2.22)      |                  | 1.60 (1.22-2.10)    |                  | 1.23 (0.76-2.01)      |                  |
| <b>R0/R1 Resection of metastases</b> |           |                           |                  |                       |                  |                     |                  |                       |                  |
| <b>Yes</b>                           | 54 (18%)  | 1                         | <b>&lt;0.001</b> | 1                     | <b>&lt;0.001</b> | 1                   | <b>&lt;0.001</b> | 1                     | <b>0.026</b>     |
| <b>No</b>                            | 242 (82%) | 2.00 (1.42-2.81)          |                  | 2.13 (1.36-3.32)      |                  | 2.08 (1.44-3.00)    |                  | 1.70 (1.06-2.72)      |                  |

|                                    |           |                  |       |                  |        |                  |        |                  |        |
|------------------------------------|-----------|------------------|-------|------------------|--------|------------------|--------|------------------|--------|
| <b>Site of Primary Tumour</b>      |           |                  |       |                  |        |                  |        |                  |        |
| <b>Right</b>                       | 179 (60%) | 1                | 0.60  | -                | -      | 1                | 0.73   | -                | -      |
| <b>Left and rectum</b>             | 116 (39%) | 0.93 (0.72-1.21) |       | -                |        | 0.95 (0.72-1.26) |        | -                |        |
| <b>NA</b>                          | 1 (1%)    |                  |       |                  |        |                  |        |                  |        |
| <b>Microsatellite status</b>       |           |                  |       |                  |        |                  |        |                  |        |
| <b>pMMR/MSS</b>                    | 160 (54%) | 1                | 0.057 | 1                | 0.0050 | 1                | <0.001 | 1                | <0.001 |
| <b>dMMR/MSI-H</b>                  | 32 (11%)  | 0.66 (0.42-1.03) |       | 0.50 (0.31-0.81) |        | 0.34 (0.20-0.60) |        | 0.30 (0.17-0.55) |        |
| <b>NA</b>                          | 104 (35%) |                  |       |                  |        |                  |        |                  |        |
| <b>Treatment arm</b>               |           |                  |       |                  |        |                  |        |                  |        |
| <b>Doublet +/- bev</b>             | 172 (58%) | 1                | 0.023 | 1                | 0.0012 | 1                | 0.75   | -                | -      |
| <b>Triplet +/- bev</b>             | 124 (42%) | 0.75 (0.58-0.96) |       | 0.57 (0.41-0.80) |        | 0.96 (0.73-1.26) |        | -                |        |
| <b>Bevacizumab-based treatment</b> |           |                  |       |                  |        |                  |        |                  |        |
| <b>Yes</b>                         | 237 (80%) | 1                | 0.094 | 1                | 0.40   | 1                | 0.41   | -                | -      |
| <b>No</b>                          | 59 (20%)  | 1.32 (0.96-1.82) |       | 1.21 (0.77-1.91) |        | 1.15 (0.83-1.61) |        | -                |        |

**Legend:** HR=hazard ratio, CI=confidence interval, N=number, ECOG-PS=Eastern Cooperative Oncology Group Performance Status, NA=not available, pMMR=proficient mismatched repair, MSS=microsatellite stable, dMMR=deficient mismatched repair, MSI-H=microsatellite instability high; Simplified score as described by Loupakis et al.<sup>12</sup>.
