# Supplementary material
Source: PubMed Central journal article supplement (PMC9428147)
Supplement: 41416_2022_1852_MOESM7_ESM.pdf [file 41416_2022_1852_MOESM7_ESM.pdf]

**Panel A**

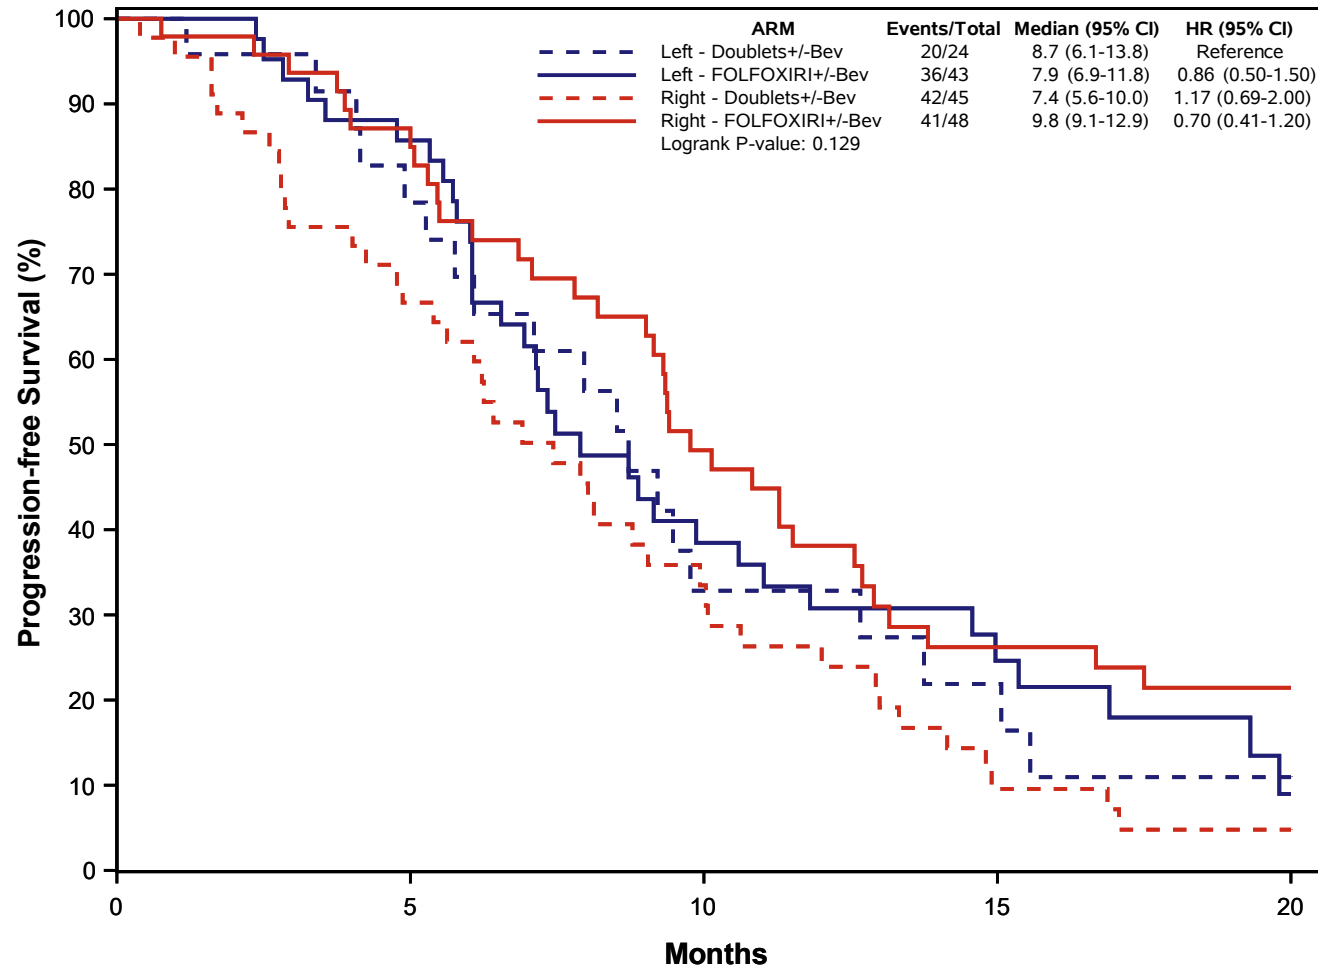

**No. at Risk**

| ARM                     | 0  | 5  | 10 | 15 | 20 |
|-------------------------|----|----|----|----|----|
| Left - Doublets+/-Bev   | 24 | 18 | 7  | 4  | 1  |
| Left - FOLFOXIRI+/-Bev  | 43 | 36 | 15 | 8  | 2  |
| Right - Doublets+/-Bev  | 45 | 30 | 14 | 4  | 2  |
| Right - FOLFOXIRI+/-Bev | 48 | 40 | 22 | 11 | 8  |

**Panel B**

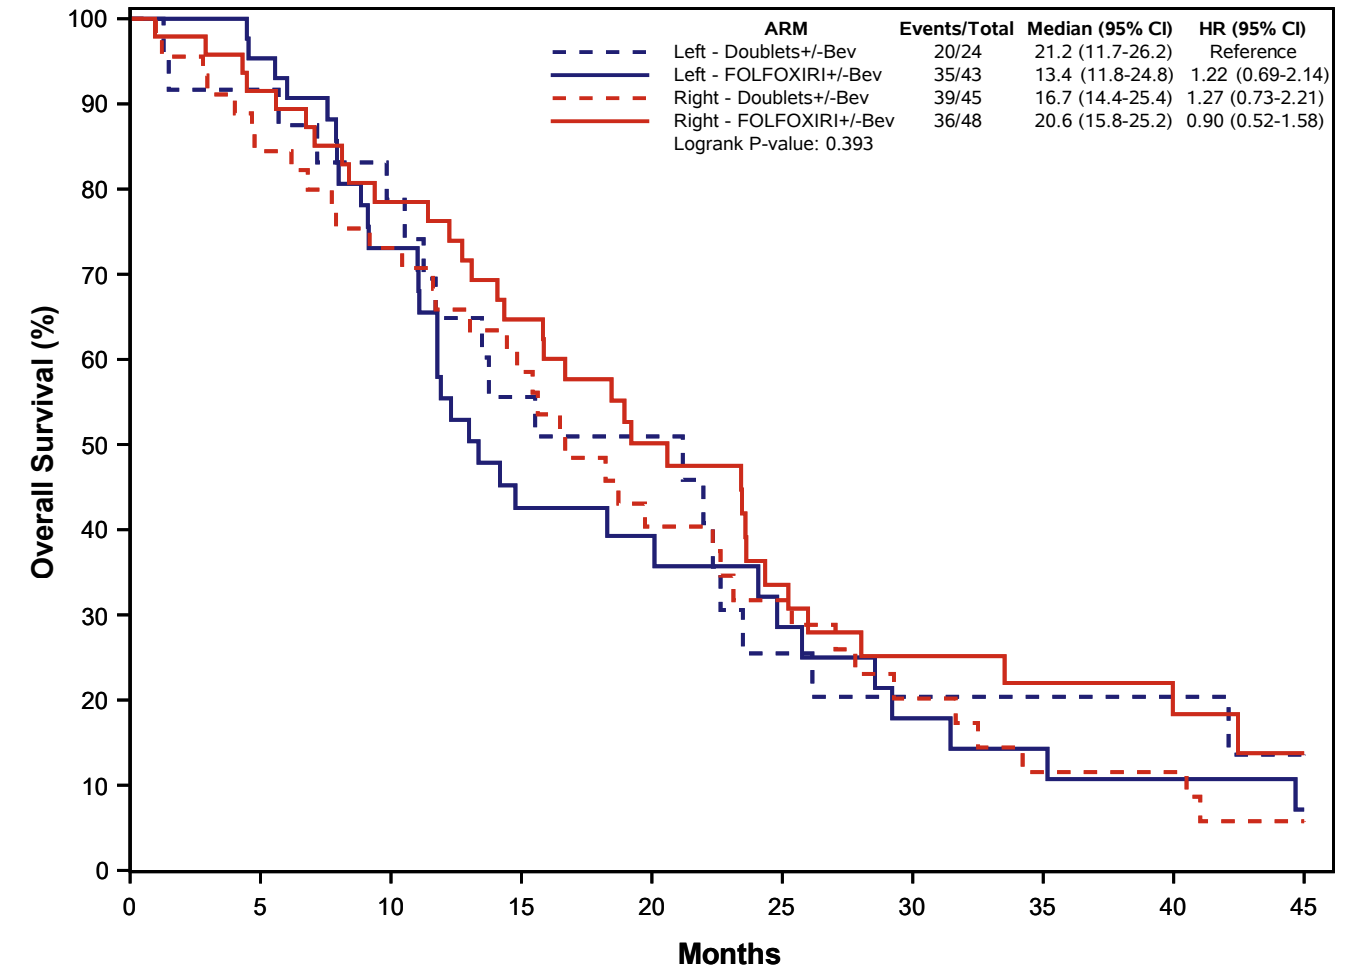

**No. at Risk**

| ARM                     | 0  | 5  | 10 | 15 | 20 | 25 | 30 | 35 | 40 | 45 |
|-------------------------|----|----|----|----|----|----|----|----|----|----|
| Left - Doublets+/-Bev   | 24 | 22 | 18 | 12 | 10 | 5  | 4  | 3  | 3  | 2  |
| Left - FOLFOXIRI+/-Bev  | 43 | 41 | 29 | 16 | 11 | 8  | 5  | 4  | 3  | 2  |
| Right - Doublets+/-Bev  | 45 | 38 | 32 | 24 | 15 | 11 | 7  | 4  | 4  | 2  |
| Right - FOLFOXIRI+/-Bev | 48 | 43 | 35 | 28 | 19 | 12 | 8  | 6  | 5  | 3  |

**Panel C**

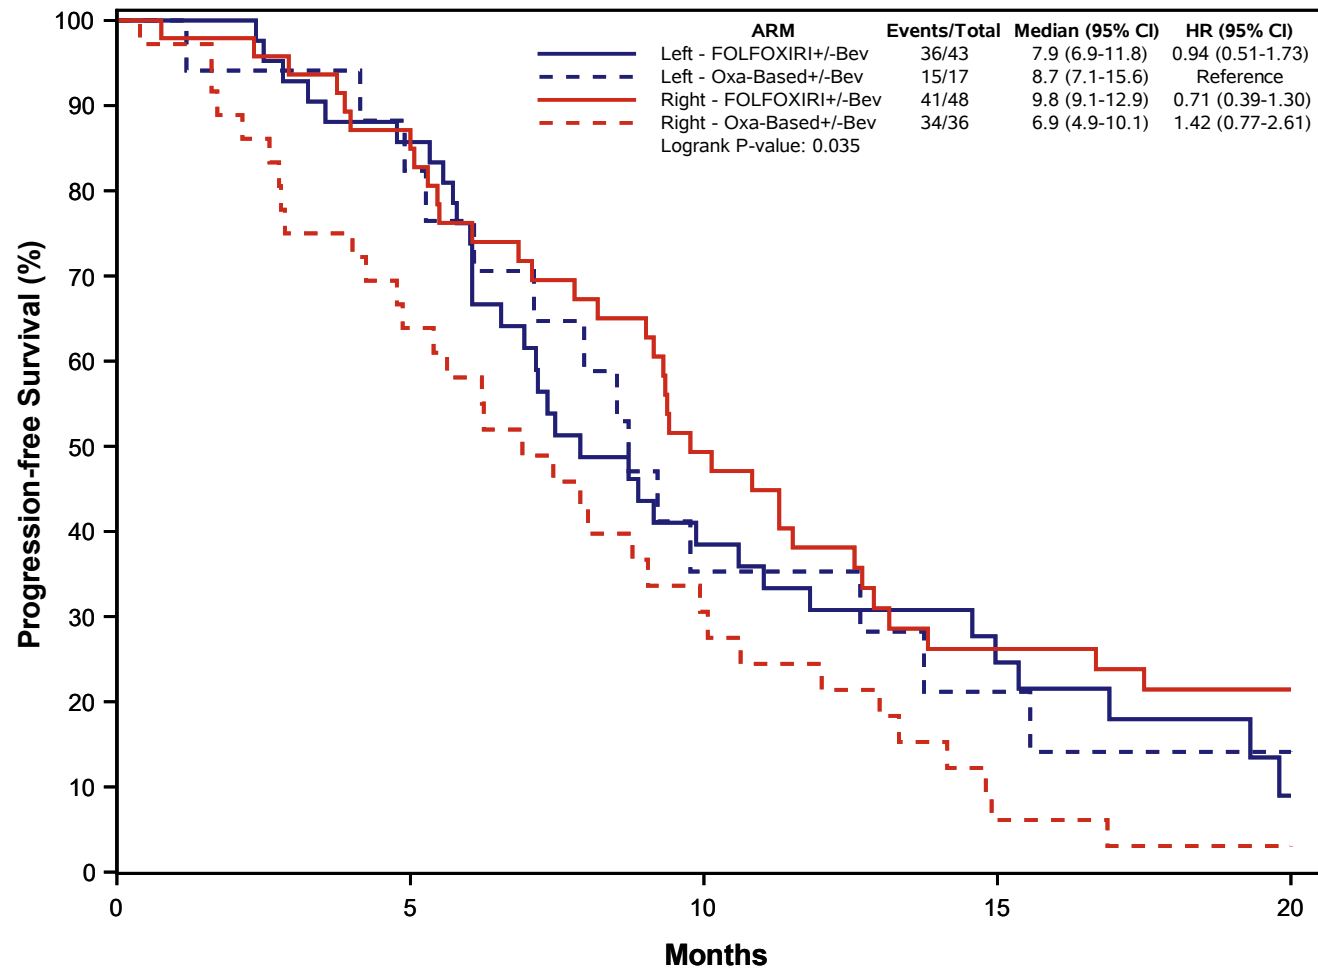

**No. at Risk**

| ARM                     | 0  | 5  | 10 | 15 | 20 |
|-------------------------|----|----|----|----|----|
| Left - FOLFOXIRI+/-Bev  | 43 | 36 | 15 | 8  | 2  |
| Left - Oxa-Based+/-Bev  | 17 | 14 | 6  | 3  | 1  |
| Right - FOLFOXIRI+/-Bev | 48 | 40 | 22 | 11 | 8  |
| Right - Oxa-Based+/-Bev | 36 | 23 | 10 | 2  | 1  |

**Panel D**

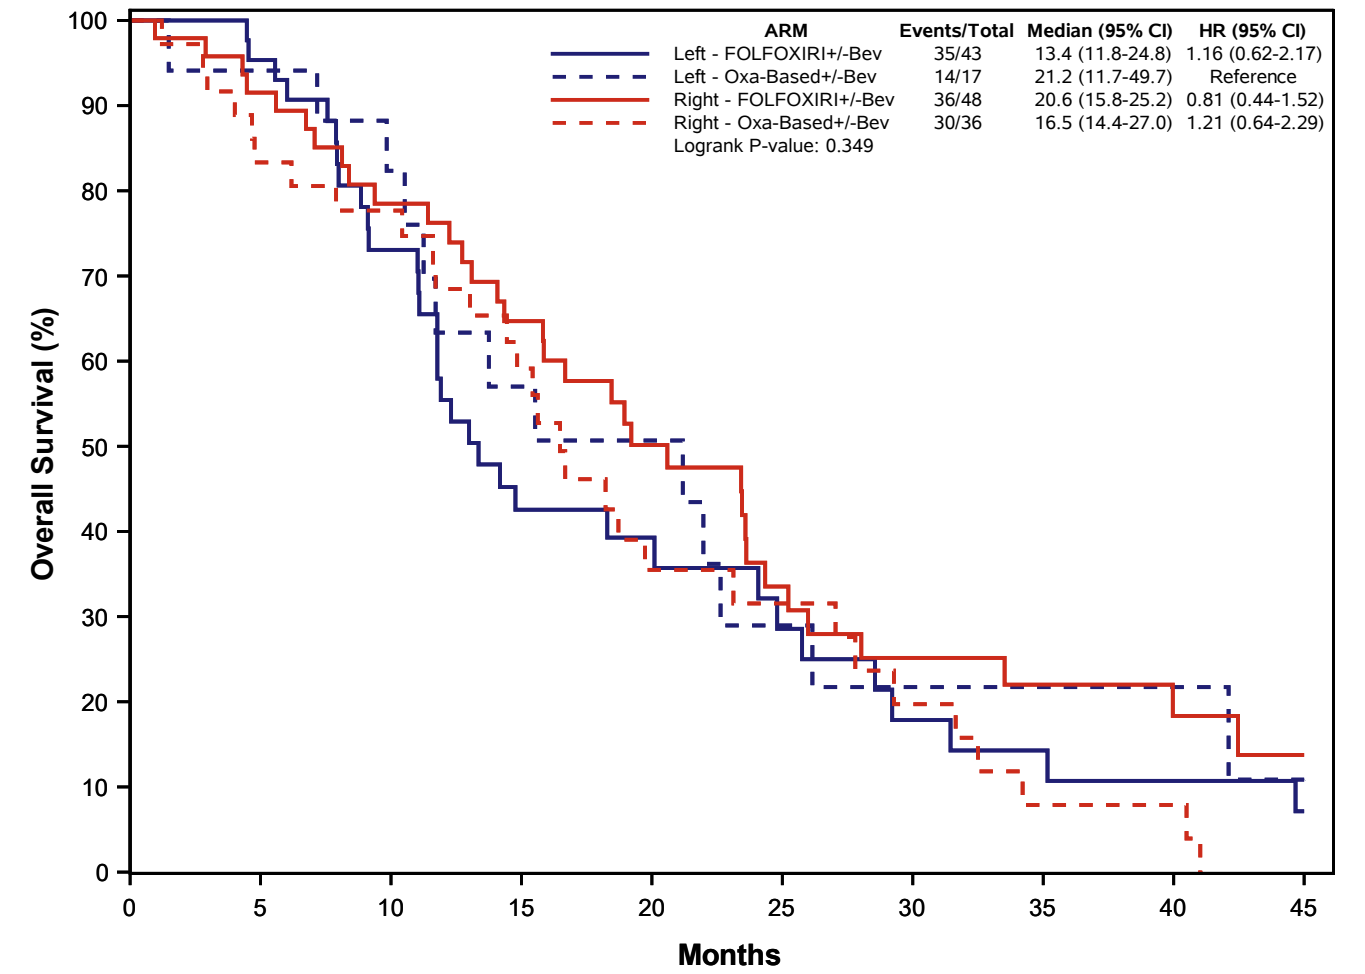

**No. at Risk**

| ARM                     | 0  | 5  | 10 | 15 | 20 | 25 | 30 | 35 | 40 | 45 |
|-------------------------|----|----|----|----|----|----|----|----|----|----|
| Left - FOLFOXIRI+/-Bev  | 43 | 41 | 29 | 16 | 11 | 8  | 5  | 4  | 3  | 2  |
| Left - Oxa-Based+/-Bev  | 17 | 16 | 14 | 9  | 7  | 4  | 3  | 2  | 2  | 1  |
| Right - FOLFOXIRI+/-Bev | 48 | 43 | 35 | 28 | 19 | 12 | 8  | 6  | 5  | 3  |
| Right - Oxa-Based+/-Bev | 36 | 30 | 27 | 19 | 10 | 8  | 5  | 2  | 2  | 0  |
